# Supplementary material for: LINC02273 drives breast cancer metastasis by epigenetically increasing AGR2 transcription
Source: PubMed Central journal article supplement (PMC6921600; doi:10.1186/s12943-019-1115-y), 2019-12-19
Supplement: 12943_2019_1115_MOESM1_ESM.pdf [file 12943_2019_1115_MOESM1_ESM.pdf]

## Additional file 1

### Additional file 1: Figure S1. LINC02273 correlates with poor prognosis in breast cancer.

(A) The flow chart for screening metastasis associated candidate lncRNAs in breast cancer. (B) Representative frozen section images of primary tumor and LN metastatic loci were shown. Red line circled out the tissue dissected for qPCR and microarray. Scale bar 500  $\mu\text{m}$  for 4 $\times$ , 100  $\mu\text{m}$  for 20 $\times$ . (C) Microarray result of the mean relative RNA expression of LN metastatic loci compared to corresponding primary tumor in 5 breast cancer patients with statistical significance ( $P < 0.05$ ). Mean log<sub>2</sub> fold change were shown. (D) Relative mRNA expression of LINC02273 1653nt and 1252nt isoforms in 319 patient cohort (Wilcoxon matched pairs signed rank test,  $***P < 0.001$ ). Normalized to GAPDH. (E) Relative mRNA expression of 1653nt and 1252nt isoform after 1653nt isoform overexpression measured by RT-qPCR.  $n=3$ , biological replicates. Normalized to GAPDH. (F) Relative mRNA expression of LINC2446 and LINC02273 after shRNA knockdown were measured by RT-qPCR.  $n=3$ , biological replicates. Normalized to GAPDH. (G) Transwell migration assay after shRNA transfection in MDA-MB-231 cells. Statistical analysis was made according to the cell confluence.  $n=3$ , biological replicates. (H) RT-qPCR for LINC02273 expression in human breast cancer with or without lymph node metastasis (Mann-Whitney test, data are shown as median with interquartile range,  $P=0.048$ ). Normalized to GAPDH. (I)-(K) Kaplan-Meier recurrence-free survival (RFS) analysis of LINC02273 expression in (I) ER positive/PR positive, (J) HER2 positive, (K) Triple negative breast cancer (TNBC), breast cancer patients (log rank test). For (E)-(G), data are means  $\pm$  s.e.m.,  $*P < 0.05$ ,  $**P < 0.01$ ,  $***P < 0.001$  and  $P$  values were determined by independent sample t-test.

**Additional file 1: Figure S2. qPCR analysis of LINC02273 expression and genes closed to LINC02273 gene locus in LINC02273 KO cells.**

(A) Kaplan-Meier metastasis-recurrence-free (MR-free) survival analysis of LINC02273 expression in 351 breast cancer patients from bc-GenExMiner 3.0 database (log rank test). (B) Relative mRNA expression of LINC02273 in breast cancer cell lines were measured by RT-qPCR. n=3, biological replicates. (C) Schematic view of LINC02273 knockout in MDA-MB-231 cells. Up, sanger sequencing after PCR with genomic DNA using primer indicated in the graph. Bottom, sanger sequencing reads of KO-1 and KO-2 MDA-MB-231 cells. (D) Relative expression of genes closed to LINC02273 gene locus, as presented in Fig. 1A, in MDA-MB-231 and LM2. Measured by RT-qPCR. n=3, biological replicates. Normalized to GAPDH. (E) Representative image of genotyping after LINC02273 knockout in MDA-MB-231, BT-549 and LM2 cells by using primer in (B) and subjected to DNA electrophoresis. (F) RT-qPCR showed LINC02273 was ectopically overexpressed in MDA-MB-231 and BT549 cells. n=3, biological replicates. For B, D, and F data are means  $\pm$  s.e.m. *P* values were determined by independent sample t-tests. \**P*<0.05, \*\**P* < 0.01, \*\*\**P* < 0.001.

**Additional file 1: Figure S3. LINC02273 promotes breast cancer proliferation and metastasis but not cancer stemness.**

(A) RT-qPCR showed LINC02273 was knocked out in MDA-MB-231, BT549, and LM2 cells.  $n=3$ , biological replicates. (B) Proliferation assay was performed after LINC02273 knockout in MDA-MB-231 and BT549 cells. Cell confluence was measured. Statistical analysis was performed on the last three time points. Results are shown as the means  $\pm$  s.e.m. from three independent experiments. (C) Transwell migration assay and invasion assay were performed after LINC02273 overexpression in MDA-MB-231, (D) BT549 cells, and (E) LM2 cells. Representative photos and quantitative analysis are shown. Confluence of migrated cells were analyzed by ImageJ. Scale bar, 100  $\mu$ m.  $n=3$ , biological replicates. (F) Mammosphere-forming assay of wild type and LINC02273 knockout cells in MDA-MB-231, LM2, and BT549. Mammospheres over 100  $\mu$ m were counted under microscope. Representative photos and quantitative analysis are shown. Scale bar 500  $\mu$ m for 4 $\times$ , 200  $\mu$ m for 10 $\times$ . For (A)-(F) data are means  $\pm$  s.e.m.  $P$  values were determined by independent sample t-tests. \* $P < 0.05$ , \*\* $P < 0.01$ , \*\*\* $P < 0.001$ .

**Additional file 1: Figure S4. LINC02273 interacts with hnRNPL.**

(A) Representative image of gel band analysis after silver staining in Fig. 4A by mass spectrometry. (B) Immunoblotting confirms nuclear-cytoplasmic fractionation efficiency in MDA-MB-231. hnRNPL was enriched in nuclear fraction. Lamin B was used as nuclear protein indicator while GAPDH as cytoplasmic fraction indicator. W, whole lysate; N, nuclear fraction; C, cytoplasmic fraction. (C) RIP efficiency in MDA-MB-231 was determined by immunoblotting. Beads only and IgG served as negative control. (D) Schematic view of the predicted secondary structure of LINC02273 RNA. According to secondary structure, we truncated LINC02273 into 3 segments and annotated as S1, S2, and S3. (E) Knockdown efficiency of hnRNPL in MDA-MB-231 and BT549 cells determined by immunoblotting. GAPDH was used as loading control. (F) RT-qPCR showed LINC02273 expression after ectopically overexpressed ETS1, STAT3, and hnRNPL in MDA-MB-231 cells. pcDNA3.1 empty vector was used as negative control. n=3, biological replicates. (G) Luciferase reporter assay of LINC02273 promoter. LINC02273 promoter region as shown in Fig. S2B was cloned into pGL3 vector. pcDNA3.1 empty vector, pcDNA3.1-STAT3, pcDNA3.1-ETS1, and pcDNA3.1-hnRNPL were co-transfected with pGL3-LINC02273 separately. pcDNA3.1 was served as negative control. Results are normalized to pcDNA3.1. n=3, biological replicates. (H) siRNA was used to knockdown hnRNPL. Left, RT-qPCR was performed and analyzed. Right, immunoblotting showed hnRNPL knockdown. siNC targeted no known sequence served as negative control. n=3, biological replicates. (I) Immunoblotting showed hnRNPL was ectopically overexpressed in MDA-MB-231 and BT549 cells. For (F)-(G), RT-qPCR data are normalized to GAPDH, means  $\pm$  s.e.m. are shown, and *P* values were determined by independent sample t-tests. \**P* < 0.05, \*\**P* < 0.01, \*\*\**P* < 0.001, *ns* not significant.

**Additional file 1: Figure S5. LINC02273 transcriptionally activates AGR2 expression which was revealed by ChIRP.**

(A) RNA pulled down by ChIRP was purified. RT-qPCR was performed to confirm the efficiency of ChIRP. ACTB, GAPDH, U6 were served as negative control. n=3, biological replicates. (B) Representative image of quality control for ChIRP. After DNA purification, Agilent 2100 was used to control sonification efficiency in ChIRP. LM, low molecular weight; HM, high molecular weight. (C) Representative images of ChIRP-seq results with indicated probes on GUCY2C genomic region. The peak range of each track were indicated in the square brackets. (D) RT-qPCR and immunoblotting showed AGR2 expression after LINC02273 knockout in LM2 cells. Data are normalized to GAPDH. n=3, biological replicates. (E) Luciferase reporter assay with LINC02273 overexpression. LINC02273 binding region of AGR2 promoter (AGR2-peak) was cloned into pGL3 basic and pGL3-enhancer (pGL3-basic with SV40 enhancer). Luciferase assay was performed with co-transfection of pcDNA3.1-LINC02273 and reporter vectors. Relative luciferase activity was calculated normalized to empty vector (EV) of pcDNA3.1. n=3, biological replicates. (F) Schematic view of AGR2 promoter region in UCSC genome browser. Layered H3K4me1, H3K4me3, and H3K27ac was shown. Transcriptional start site was indicated by black arrow. (G) ChIP-qPCR was performed in MDA-MB-231 WT and LINC02273 KO cells with indicated antibody. ACTB were used as negative control. AGR2 primer were designed in AGR2-TSS region named H3 primer. n=3, biological replicates. For (A), (D)-(F), and (G), means  $\pm$  s.e.m. are shown, and *P* values were determined by independent sample t-tests. \**P* < 0.05, \*\**P* < 0.01, \*\*\**P* < 0.001.

**Additional file 1: Figure S6. hnRNPL-LINC02273 complex promotes cancer metastasis through upregulating AGR2.**

(A) RT-qPCR and immunoblotting showed AGR2 overexpression in MDA-MB-231 and BT549 cells. pCDH empty vector were used as negative control. Normalized to GAPDH, n=3, biological replicates. (B) immunoblotting showed AGR2 were overexpressed in LM2 cell lines as indicated. n=3 independent experiments. (C) Transwell migration assay was performed with cell lines from (B). Representative photos and quantitative analysis are shown. Scale bar, 100  $\mu$ m. n=3, biological replicates. (D) immunoblotting showed AGR2 expression in hnRNPL knockdown BT549 cell (one clone named gR-C2). WT served as negative control. n=3, biological replicates. (E) ChIP-qPCR showed hnRNPL fold enrichment on AGR2 promoter region that LINC02273 binds. (F) RT-qPCR and immunoblotting showed AGR2 expression in WT and LINC02273 KO cells, and ectopic recovered LINC02273 KO cells. Normalized to GAPDH, n=3, biological replicates. (G) AGR2 mRNA expression level in WT and hnRNPL knockdown MDA-MB-231 cells with or without LINC02273 overexpression by RT-qPCR. Normalized to GAPDH. n=3, biological replicates. (H) ChIP-qPCR showed H3K4me3 fold enrichment on AGR2 promoter region that LINC02273 binds. Normalized to 1% input. n=3, biological replicates. (I) ChIP-qPCR showed H3K27ac fold enrichment on AGR2 promoter region that LINC02273 binds. Normalized to 1% input. n=3, biological replicates. For (A), (C), (E)-(I), means  $\pm$  s.e.m. are shown, and *P* values were determined by independent sample t-tests. \**P* < 0.05, \*\**P* < 0.01, \*\*\**P* < 0.001.

**Additional file 1: Figure S7. Epigenetic regulation of modification at AGR2 promoter by hnRNPL was dependent on LINC02273.**

(A) Immunoblotting showed hnRNPL expression after ectopically overexpression in MDA-MB-231 cells. (B) ChIP-qPCR was performed in WT and LINC02273 knockout MDA-MB-231 cells overexpressed with hnRNPL or pCDH empty vector with indicated antibodies. Normalized to 1% input. n=3, biological replicates. (C) RT-qPCR showed LINC02273 expression in WT and hnRNPL knockdown cells with or without LINC02273 overexpression. Normalized to GAPDH, n=3, biological replicates. (D) ChIP-qPCR was performed in WT and hnRNPL knockdown (hnRNPL-gR-c38) MDA-MB-231 cells overexpressed with LINC02273 or pCDH empty vector with indicated antibodies. Normalized to 1% input. n=3, biological replicates. (E) Relative expression of hnRNPL, LINC02273 and AGR2 mRNA was determined by RT-qPCR in 606-patient cohort (data are median with interquartile range). For (B)-(D) means  $\pm$  s.e.m. are shown, *P* values were determined by independent sample t-tests. \**P* < 0.05, \*\**P* < 0.01, \*\*\**P* < 0.001, *ns* not significant.

**Additional file 1: Figure S8. Targeting LINC02273 with ASO showed potential in mitigating breast cancer metastasis.**

(A) Relative expression of LINC02273 48h after ASO transfection were determined by RT-qPCR (normalized to GAPDH). (B) Proliferation assay was performed in MDA-MB-231 and BT549 cells with ASO transfection. Cell confluence was measured. Statistical analysis was performed on 120h (independent t-test). n=3, biological replicates. (C) Transwell migration assay and invasion assay were performed after ASO transfection in MDA-MB-231, LM2, and BT549 cells. Representative photos and quantitative analysis are shown. Scale bar, 100  $\mu$ m. n=3, biological replicates. (D) Relative expression of AGR2 48h after ASO transfection determined by RT-qPCR (normalized to GAPDH) in MDA-MB-231 and LM2 cells. n=3, biological replicates. (E) Representative images of H&E staining of lung metastasis from mice cohort in Fig. 7E. Two representative images were shown from each group. Scale bars: black, 2 mm; pink, 100  $\mu$ m. For (A)-(D), means  $\pm$  s.e.m. are shown, and *P* values were determined by independent sample t-tests. \**P* < 0.05, \*\**P* < 0.01, \*\*\**P* < 0.001.



Figure S1

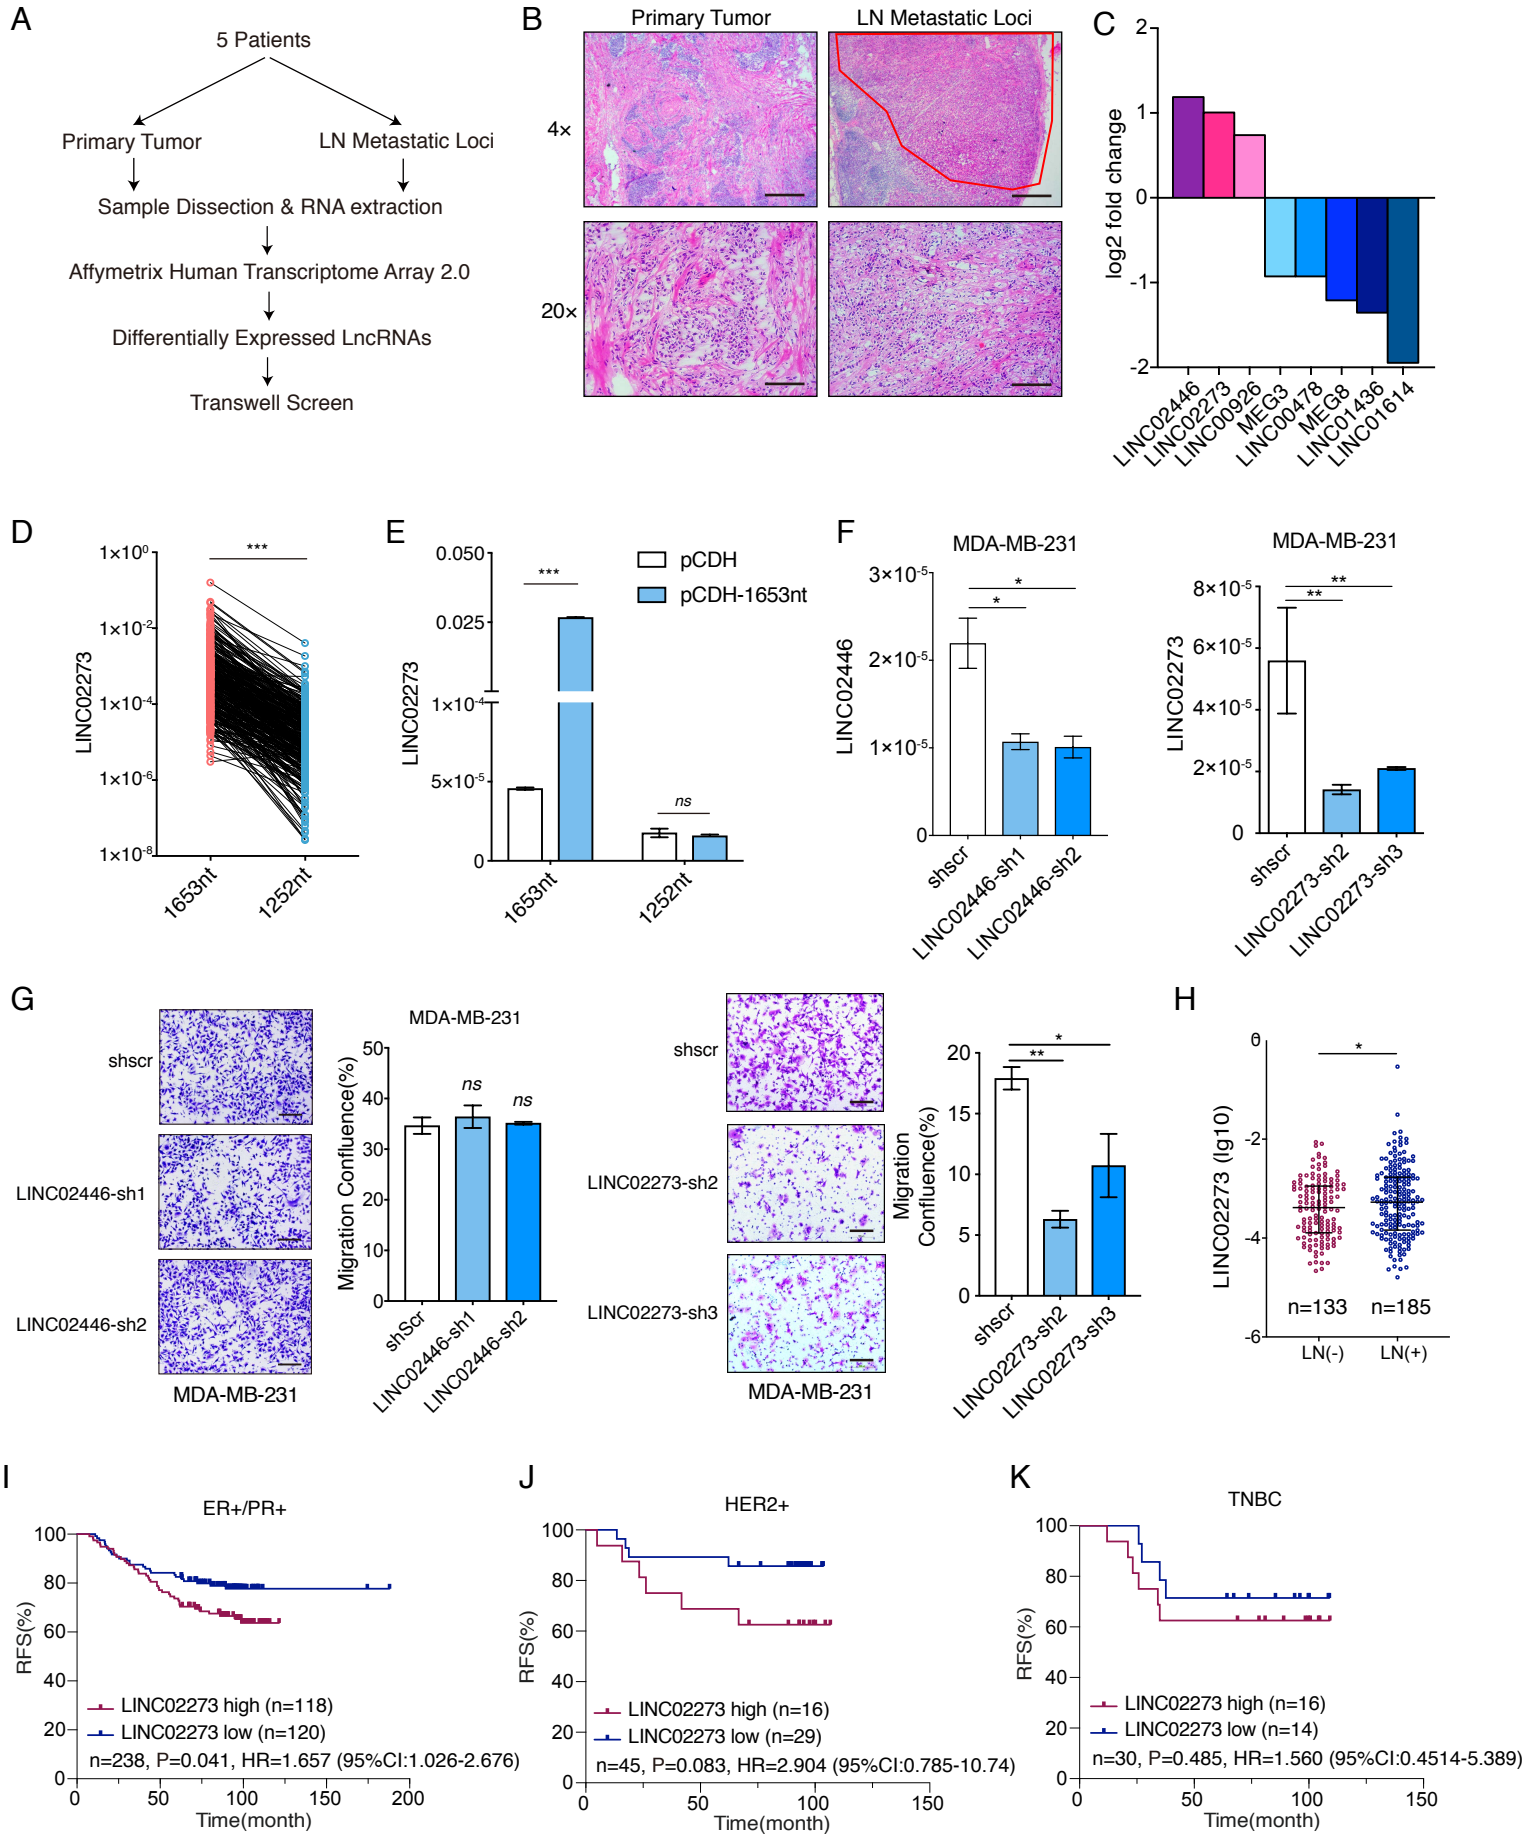

Figure S2

A

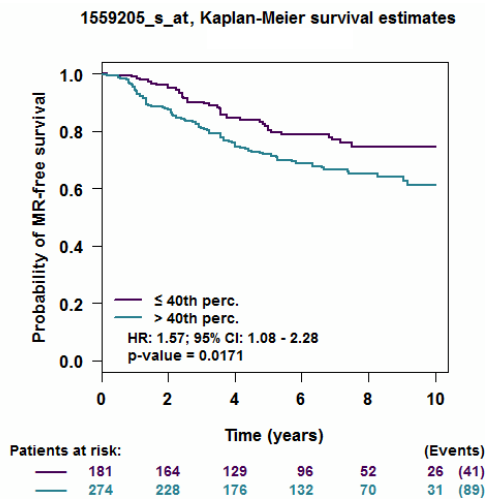

B

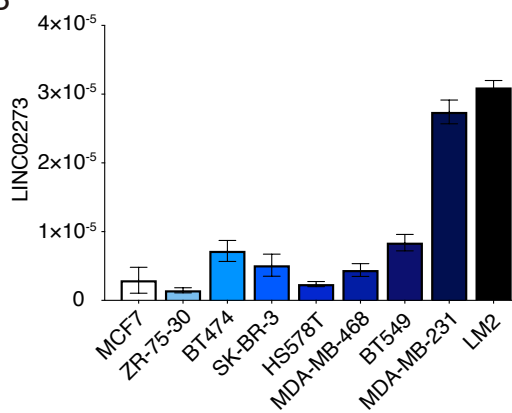

C

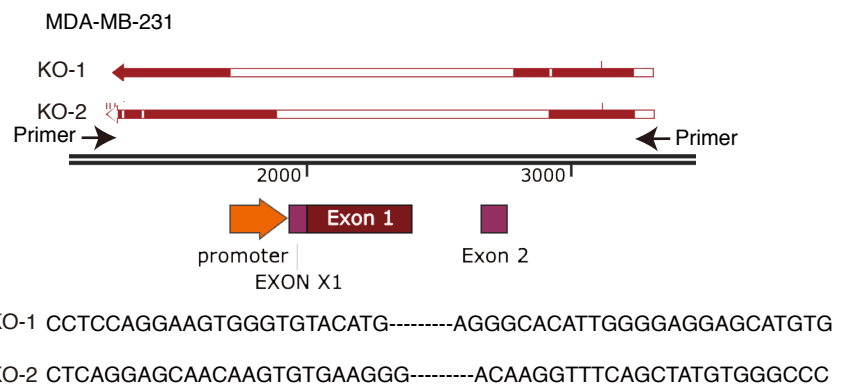

D

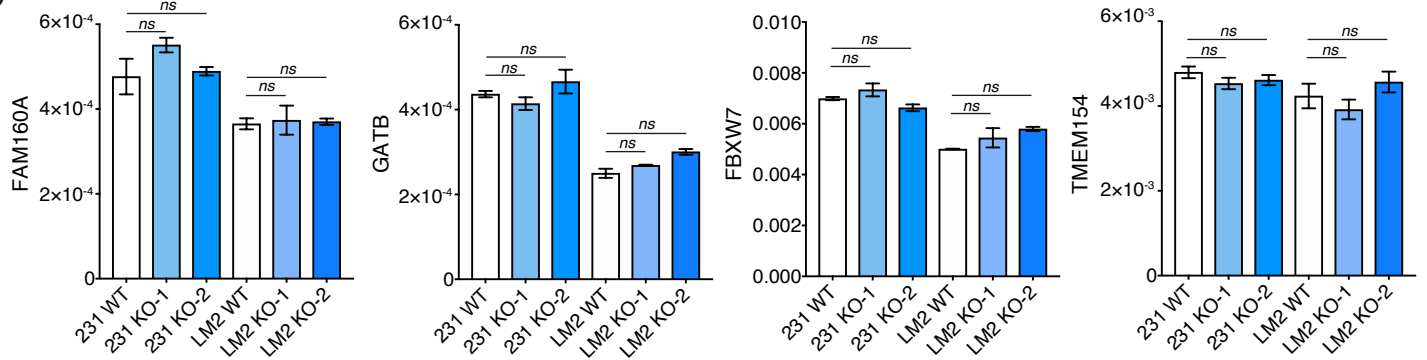

E

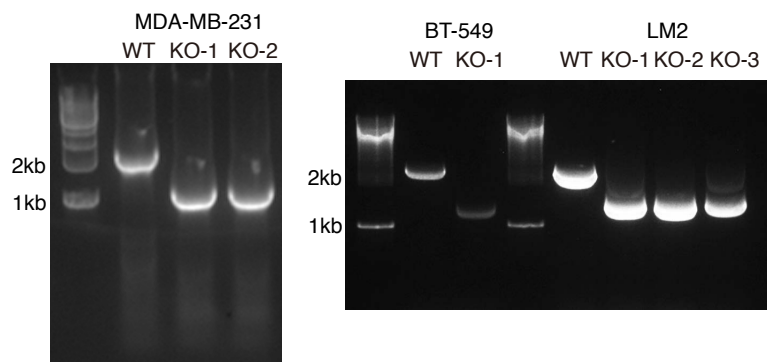

F

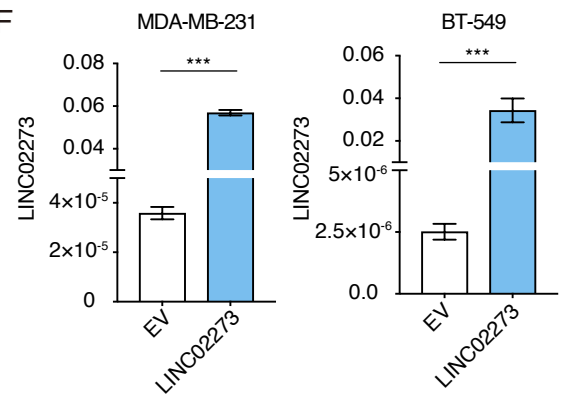

Figure S3

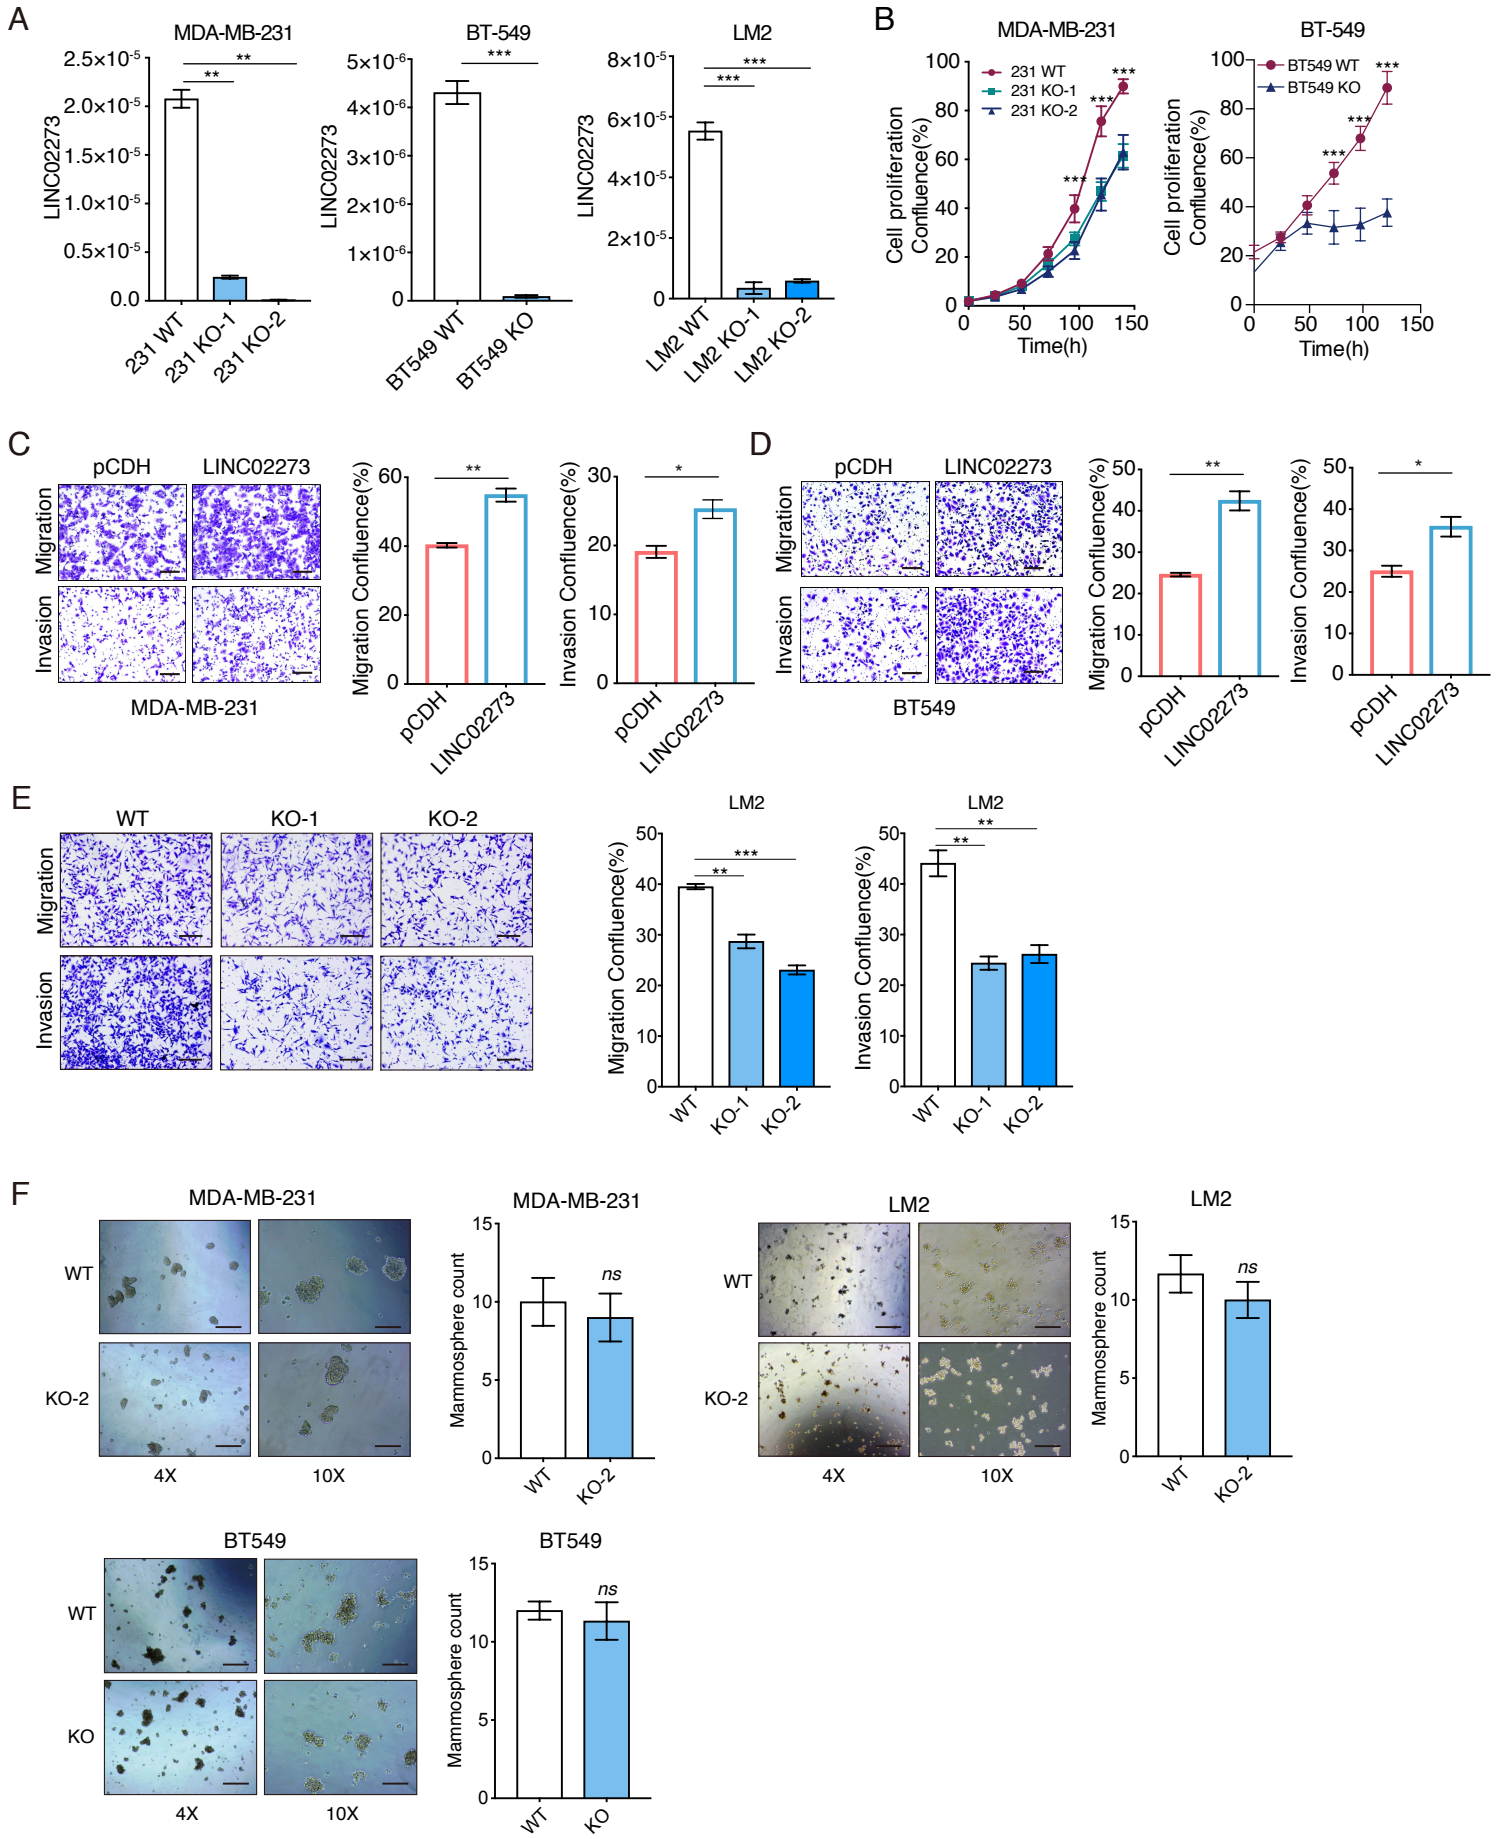

Figure S4

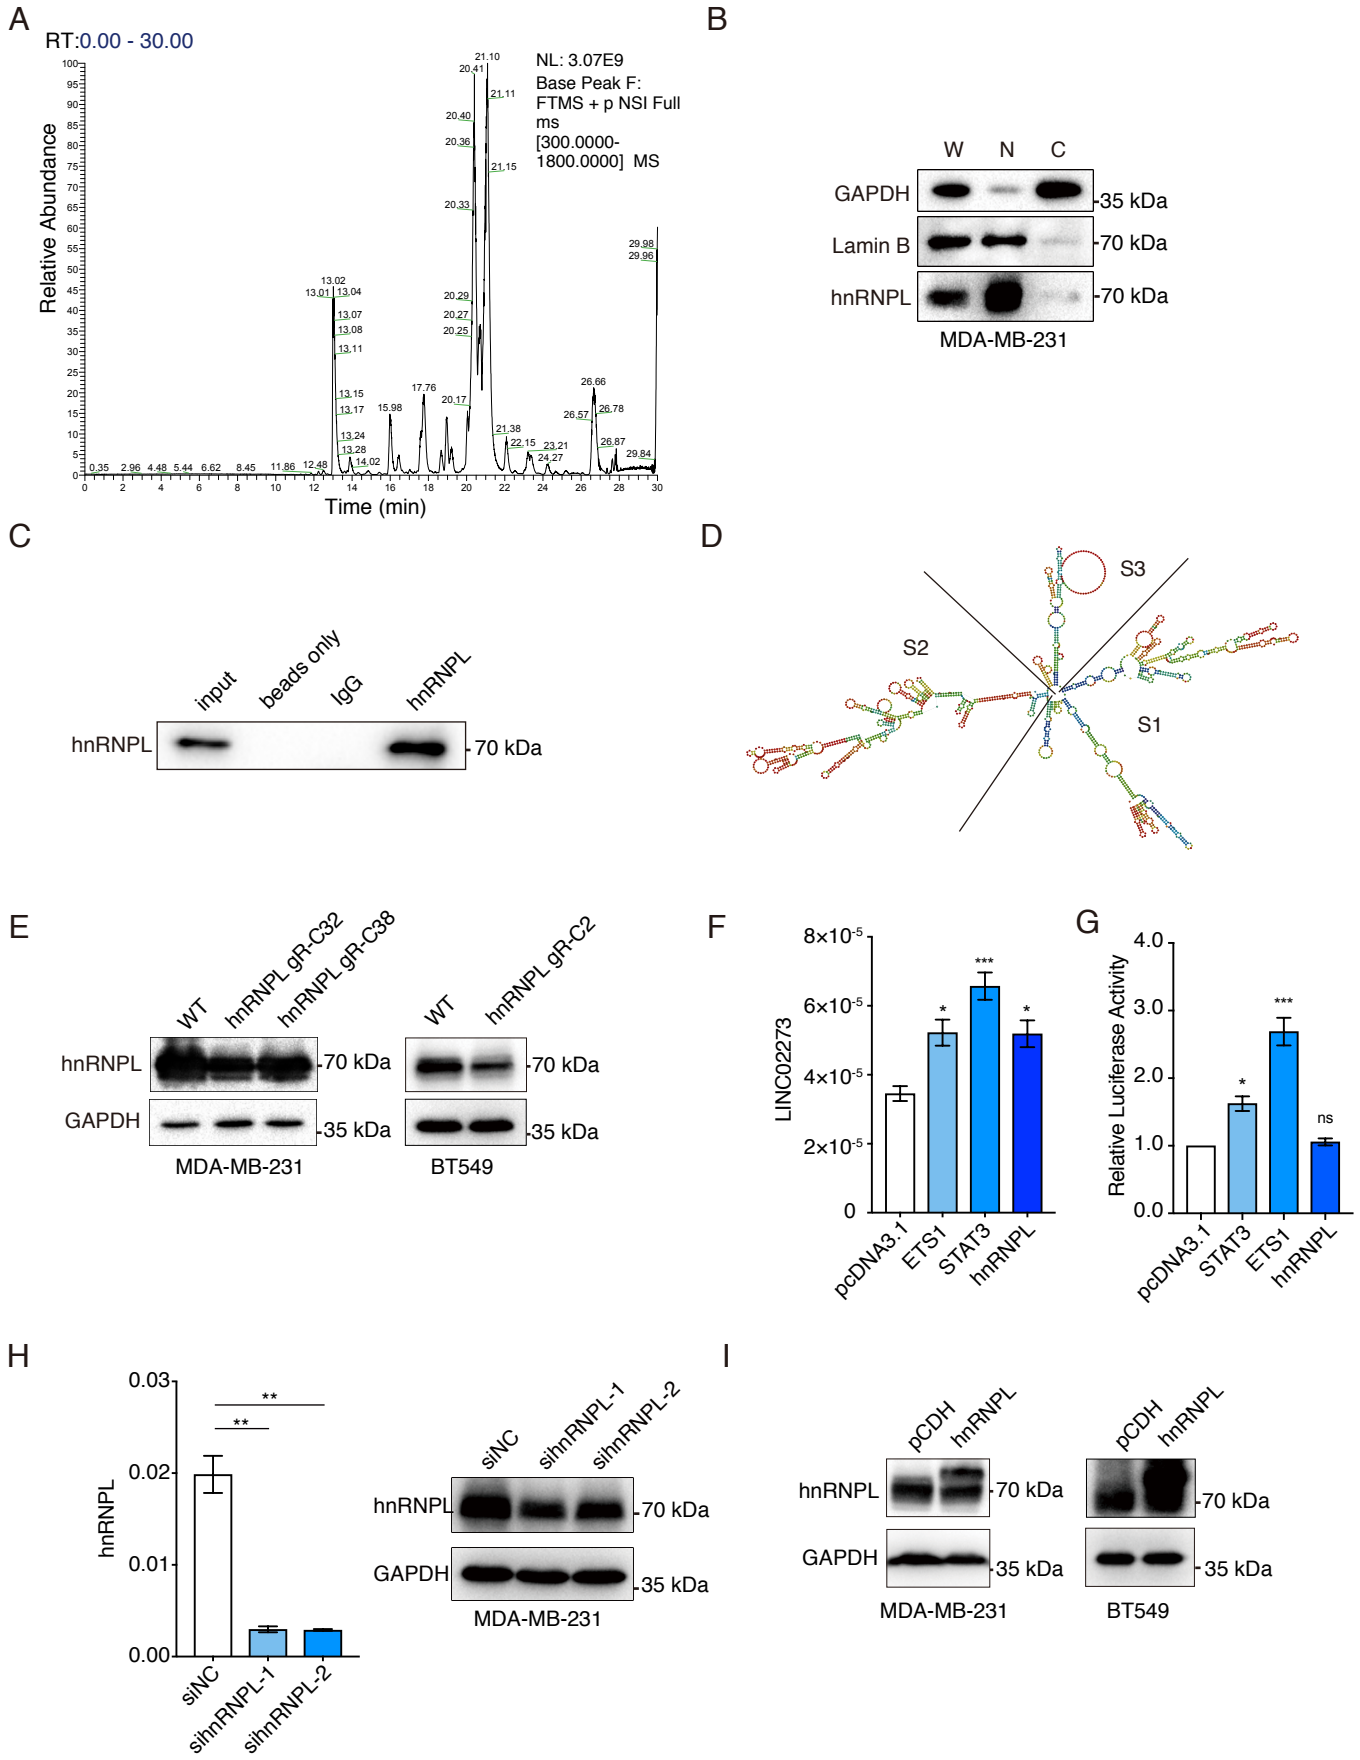

Figure S5

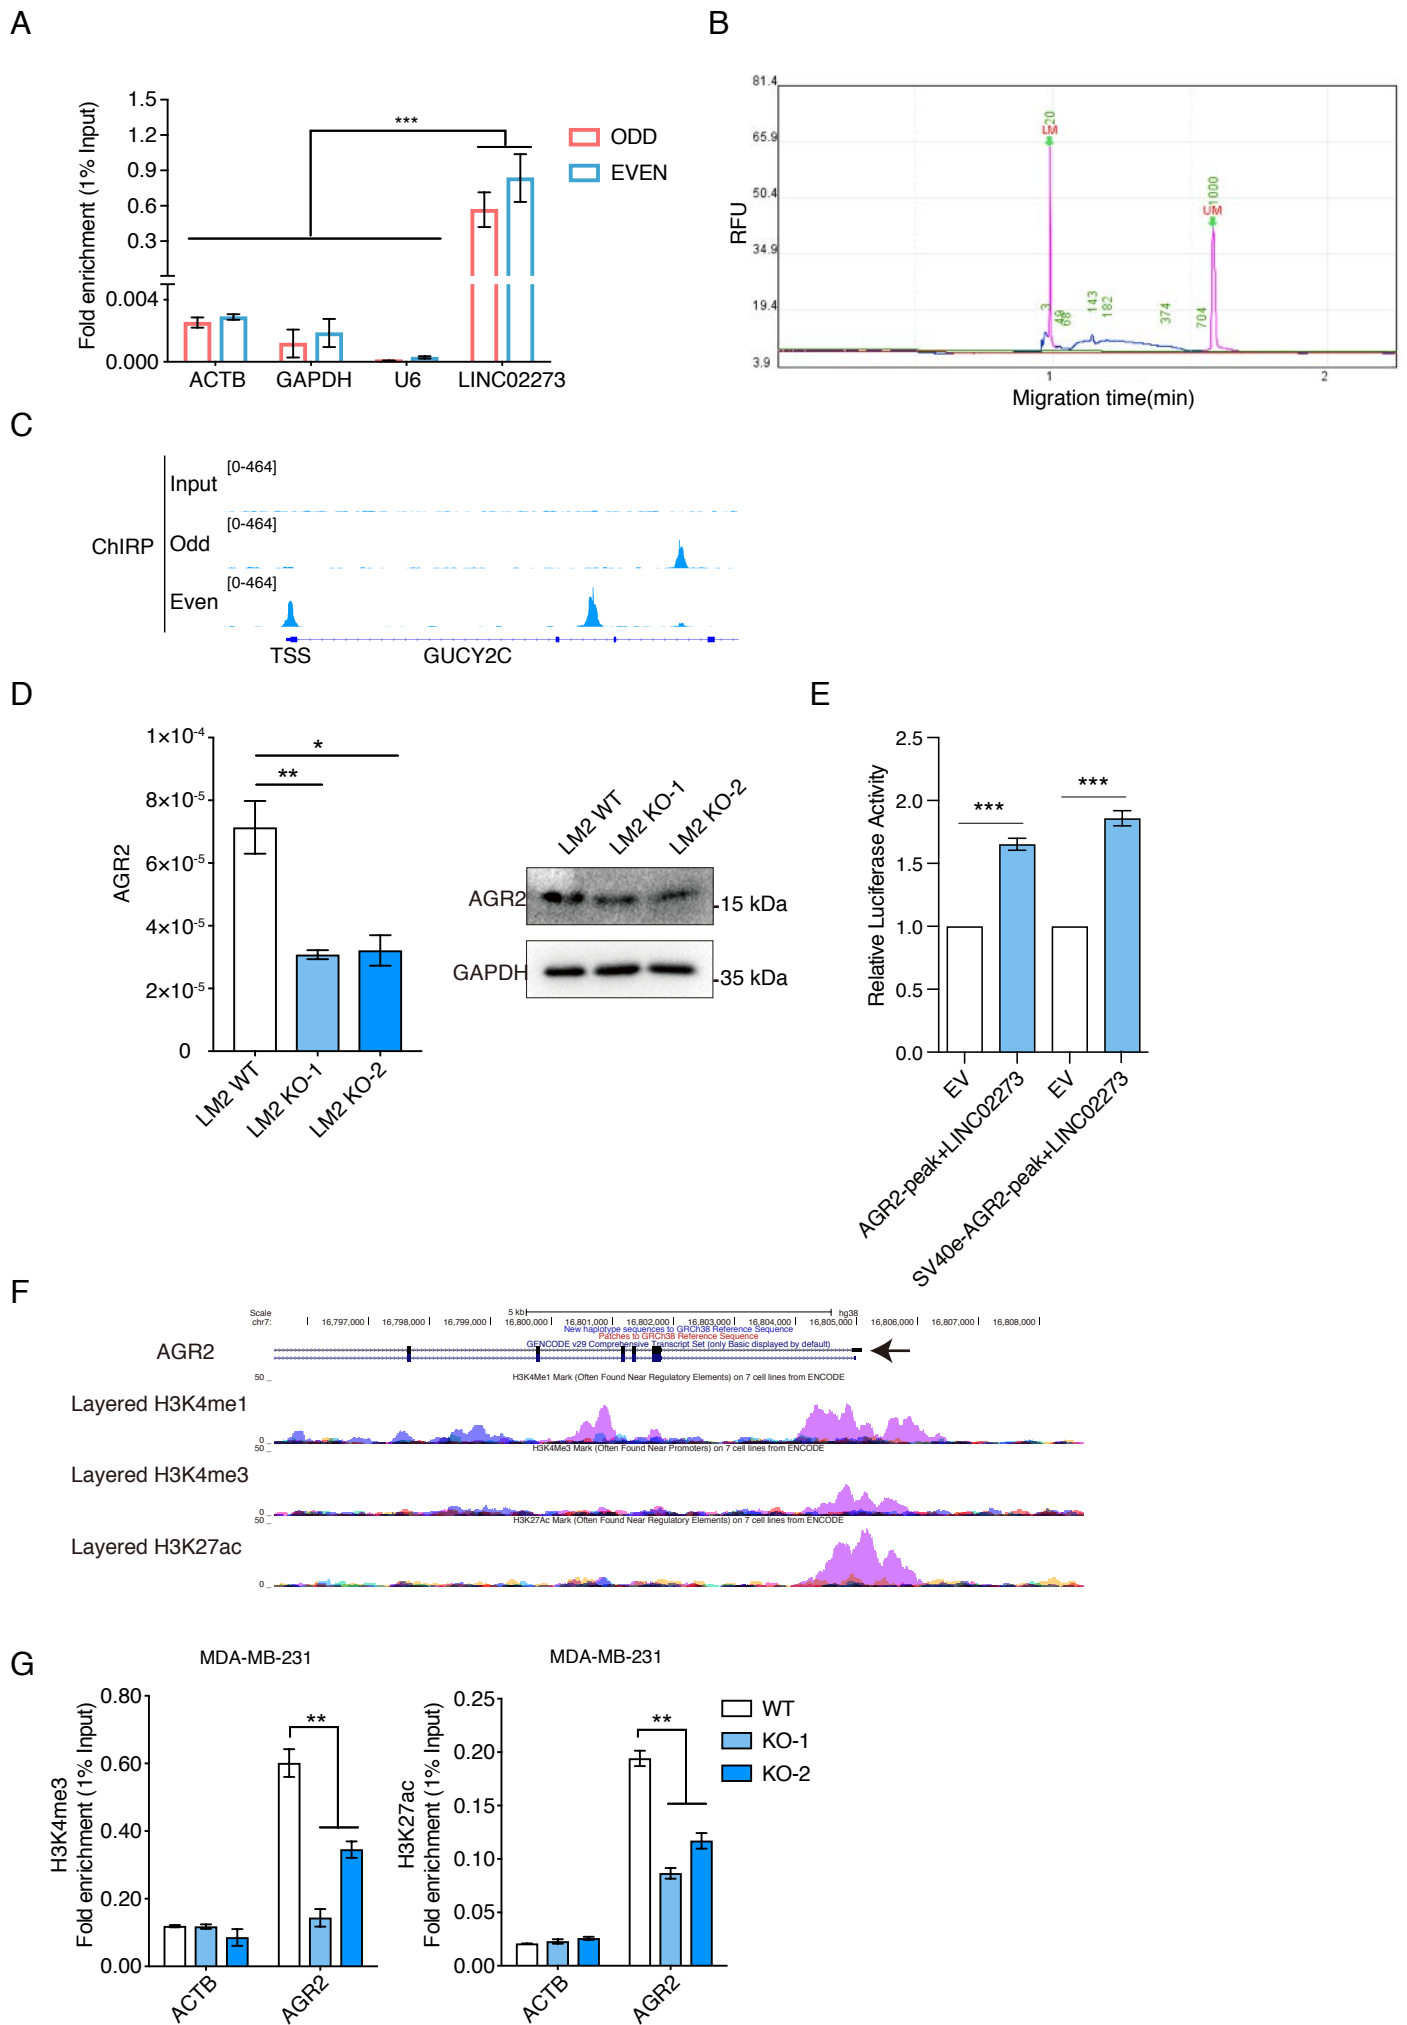

Figure S6

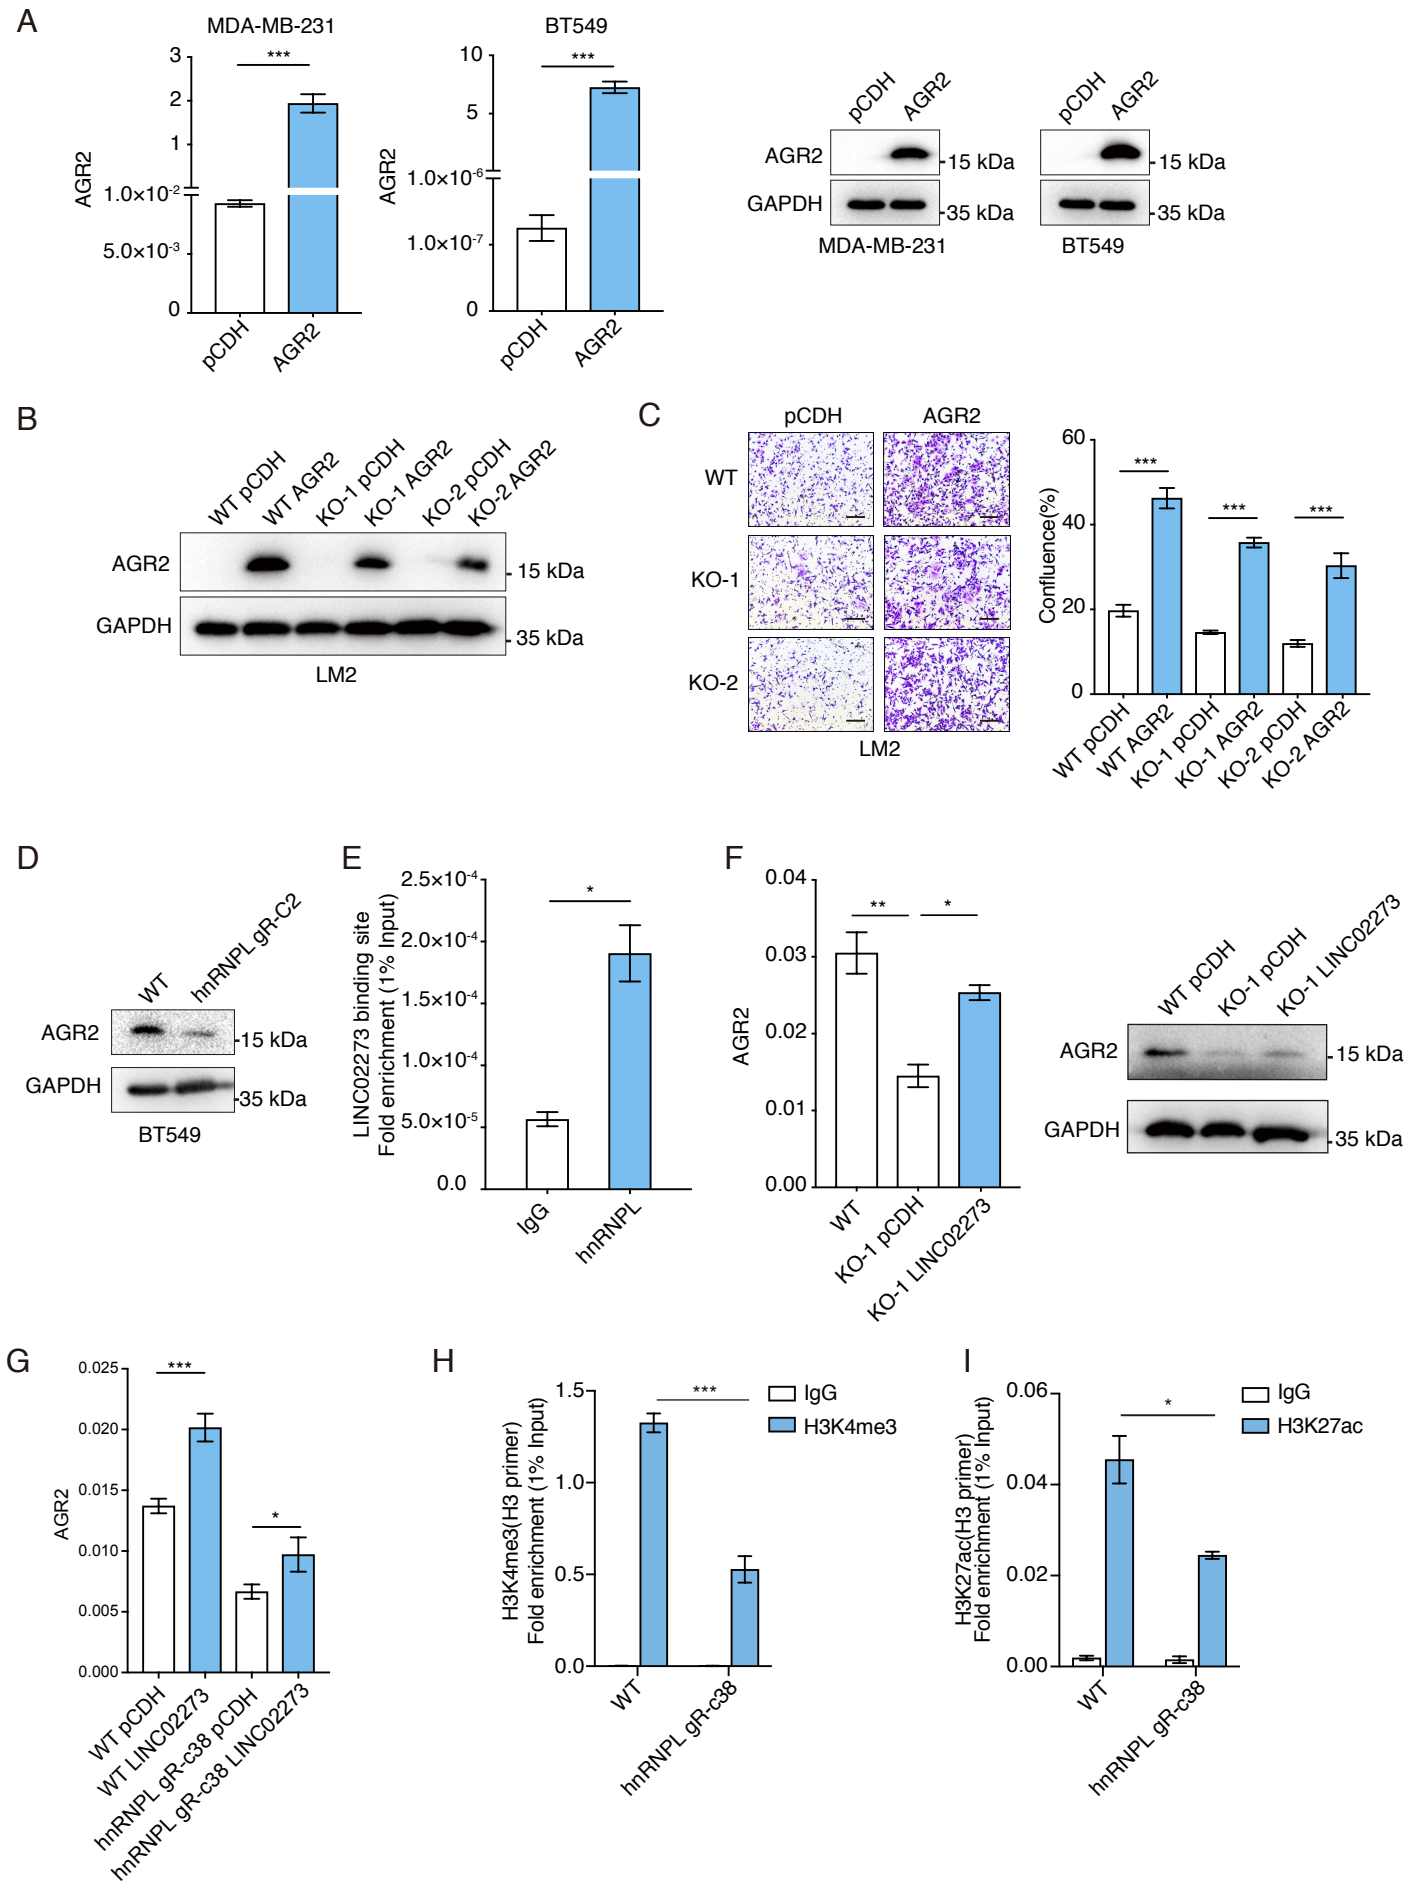



Figure S7

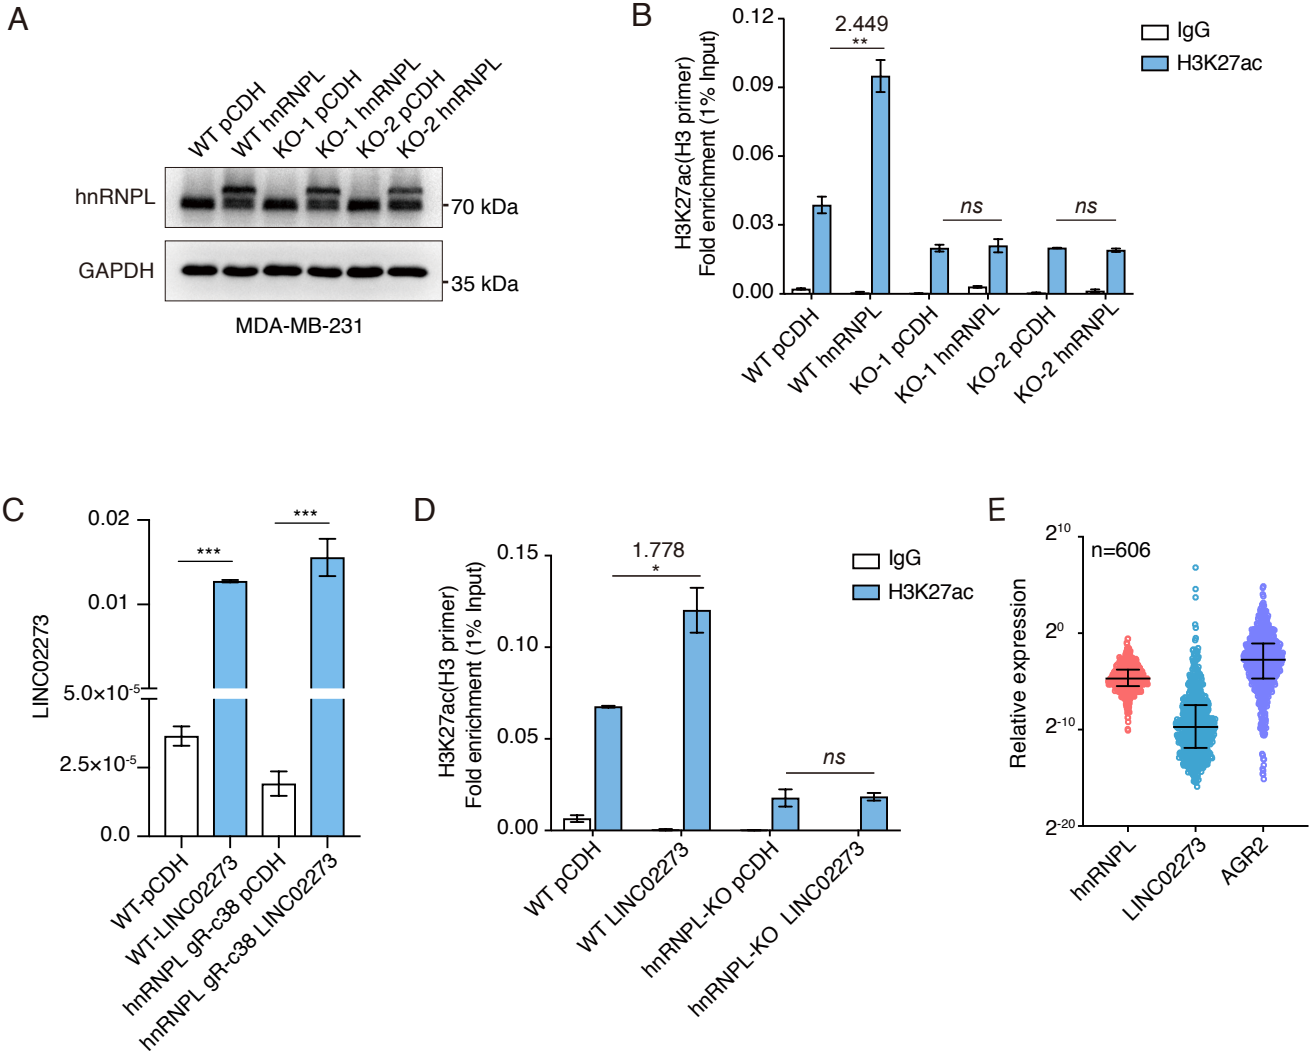

Figure S8

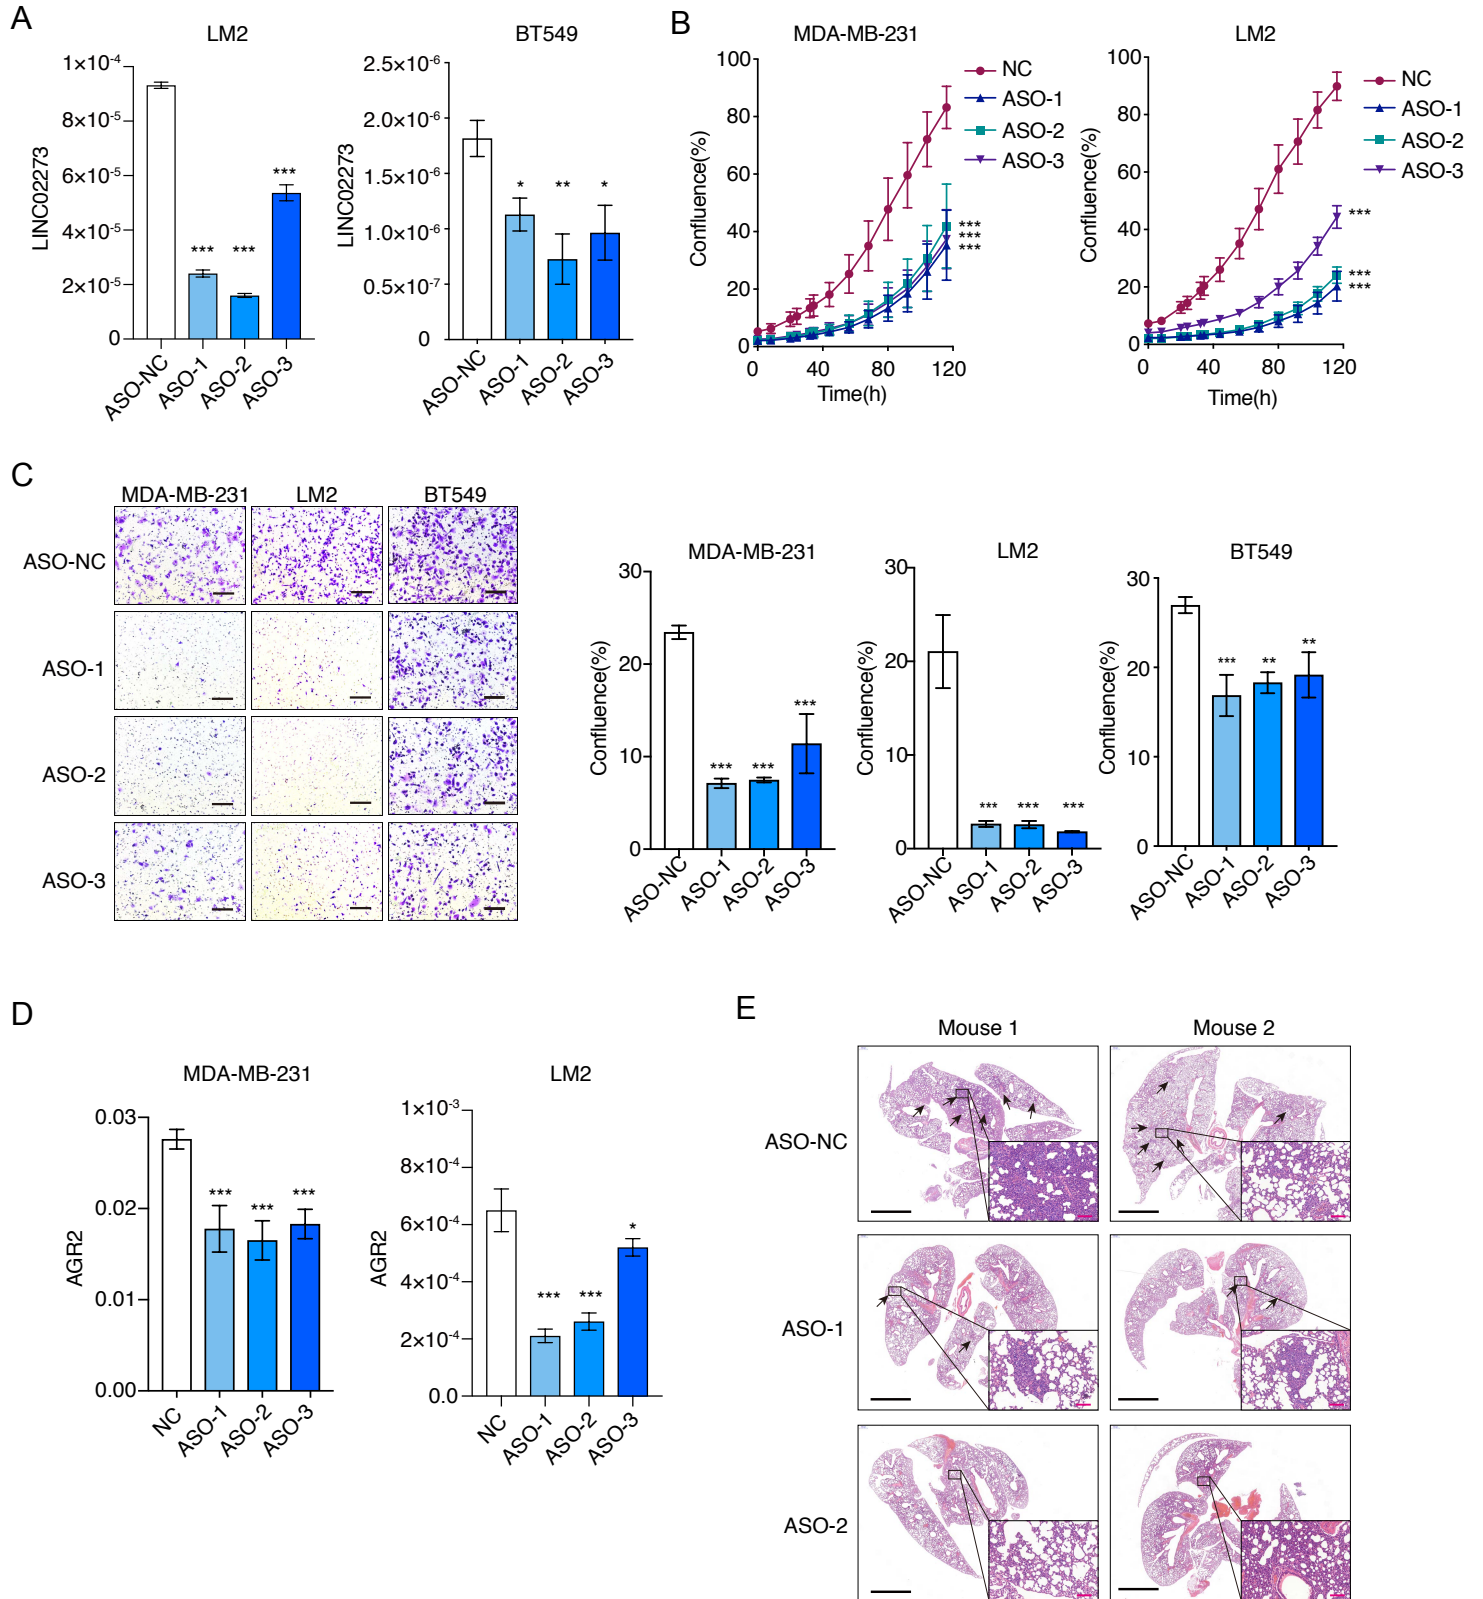



Additional file 1: Table S1. Patient characteristics of RNA microarray

| Patient | Tumor Size | Grade | ER    | PR   | HER2  | Ki-67 | SLN (+) | non-SLN (+) |
|---------|------------|-------|-------|------|-------|-------|---------|-------------|
| Case A  | 1.7 cm     | II    | 100%+ | 90%+ | IHC-  | 20%   | 1       | 0           |
| Case B  | 2 cm       | II    | 90%+  | 90%+ | IHC-  | 40%   | 2       | 0           |
| Case C  | 2.2 cm     | III   | 70%+  | 70%+ | IHC-  | 30%   | 1       | 0           |
| Case D  | 1.8 cm     | II    | 90%+  | 5%+  | FISH- | 20%   | 1       | 0           |
| Case E  | 2 cm       | II    | 90%+  | 90%+ | IHC-  | 40%   | 2       | 0           |

Abbreviations: ER, estrogen receptor; PR, progesterone receptor; HER2, human epidermal growth factor receptor 2; SLN, sentinel lymph node; IHC, immunohistochemistry; FISH: Fluorescence in situ hybridization.

Additional file 1: Table S2. CPAT prediction of LINC02273

| Refence genome | RNA Size | ORF Size | Ficket Score | Hexamer Score | Coding Probability | Coding Label |
|----------------|----------|----------|--------------|---------------|--------------------|--------------|
| hg19           | 1653     | 165      | 0.5037       | -0.15946054   | 0.00277711         | no           |

Additional file 1: Table S3. CPC prediction of LINC02273

| Refence genome | Coding/non coding | Coding potential score |
|----------------|-------------------|------------------------|
| hg19           | noncoding (weak)  | -0.941269              |

Additional file 1: Table S4. Baseline clinicopathological characteristics of patients according to LINC02273 expression

| Characteristics  |               | Low | High | <i>P</i> value |
|------------------|---------------|-----|------|----------------|
| Age at diagnosis | <40           | 11  | 8    | 0.814          |
|                  | ≥40           | 158 | 142  |                |
| BMI at diagnosis | <18.5         | 7   | 1    | 0.147          |
|                  | 18.5-24       | 104 | 98   |                |
|                  | >24           | 55  | 51   |                |
| Subtype          | ER+/PR+       | 120 | 118  | 0.187          |
|                  | HER2 positive | 29  | 16   |                |
|                  | TNBC          | 14  | 16   |                |
| ER               | Negative      | 55  | 36   | 0.135          |
|                  | Positive      | 114 | 112  |                |
| PR               | Negative      | 36  | 27   | 0.322          |
|                  | Positive      | 118 | 122  |                |
| HER2             | Negative      | 104 | 101  | 0.079          |
|                  | Positive      | 57  | 35   |                |
| Ki-67            | Low           | 60  | 57   | 0.084          |
|                  | High          | 53  | 30   |                |
| Tumor grade      | I & II        | 102 | 88   | 0.638          |
|                  | III           | 58  | 56   |                |
| pT               | pT1           | 69  | 51   | 0.369          |
|                  | pT2           | 92  | 94   |                |
|                  | pT3           | 7   | 5    |                |
| pN               | pN0           | 73  | 60   | 0.544          |
|                  | pN1           | 52  | 41   |                |
|                  | pN2           | 22  | 20   |                |
|                  | pN3           | 22  | 28   |                |
| LVI              | Negative      | 89  | 82   | 0.496          |
|                  | Positive      | 79  | 62   |                |

Abbreviations: BR: Breast Cancer; HR: hazard ratio; CI: confidence interval; BMI, body mass index; ER, estrogen receptor; PR, progesterone receptor; HER2, human epidermal growth factor receptor 2; LVI: lymphovascular invasion. Fisher exact test was used. Statistically significant (\* $P < 0.05$  and \*\* $P < 0.01$ ).

Additional file 1: Table S5. Univariate COX regression analyses of RFS in BC patients

| Characteristics  |          | No of Patients | No of Events | <i>P</i> value | HR (95%CI)          |
|------------------|----------|----------------|--------------|----------------|---------------------|
| Age at diagnosis | <40      | 13             | 6            |                |                     |
|                  | ≥40      | 216            | 84           | 0.888          | 0.942 (0.412-2.157) |
| BMI at diagnosis | <18.5    | 5              | 3            |                |                     |
|                  | 18.5-24  | 146            | 56           | 0.519          | 0.682 (0.214-2.179) |
|                  | >24      | 76             | 30           | 0.594          | 0.724 (0.221-2.373) |
| Subtype          | ER+/PR+  | 171            | 67           |                |                     |
|                  | HER2     | 34             | 11           | 0.748          | 0.901 (0.476-1.705) |
|                  | TNBC     | 20             | 10           | 0.437          | 1.302 (0.67-2.531)  |
| ER               | Negative | 67             | 24           |                |                     |
|                  | Positive | 162            | 64           | 0.842          | 1.049 (0.656-1.677) |
| HER2             | Negative | 156            | 49           |                |                     |
|                  | Positive | 64             | 28           | 0.217          | 1.339 (0.842-2.131) |
| Ki-67            | Low      | 86             | 31           |                |                     |
|                  | High     | 51             | 27           | 0.135          | 1.472 (0.887-2.443) |
| Tumor grade      | I & II   | 143            | 47           |                |                     |
|                  | III      | 78             | 36           | 0.139          | 1.388 (0.899-2.144) |
| pT               | pT1      | 91             | 29           |                |                     |
|                  | pT2      | 129            | 57           | 0.180          | 1.357 (0.868-2.123) |
|                  | pT3      | 8              | 4            | 0.406          | 1.558 (0.548-4.432) |
| pN               | pN0      | 112            | 21           |                |                     |
|                  | pN1      | 65             | 28           | 0.013*         | 2.053 (1.166-3.615) |
|                  | pN2      | 28             | 14           | 0.015*         | 2.321 (1.18-4.566)  |
|                  | pN3      | 24             | 26           | 0.000**        | 4.355 (2.447-7.75)  |
| LVI              | Negative | 131            | 40           |                |                     |
|                  | Positive | 96             | 45           | 0.076          | 1.47 (0.96-2.252)   |
| LINC02273        | Low      | 132            | 37           |                |                     |
|                  | High     | 97             | 53           | 0.016*         | 1.677 (1.102-2.553) |

Abbreviations: BR: Breast Cancer; HR: hazard ratio; CI: confidence interval; BMI, body mass index; ER, estrogen receptor; PR, progesterone receptor; HER2, human epidermal growth factor receptor 2; LVI: lymphovascular invasion. Statistically significant (\* $P < 0.05$  and \*\* $P < 0.01$ ).

Additional file 1: Table S6. Multivariate COX regression analyses of RFS in BC patients

| Characteristics |      | No of Patients | No of Events | <i>P</i> value | HR                  |
|-----------------|------|----------------|--------------|----------------|---------------------|
| LINC02273       | Low  | 132            | 37           |                |                     |
|                 | High | 97             | 53           | 0.045*         | 1.543 (1.010-2.358) |
| pN              | pN0  | 112            | 21           |                |                     |
|                 | pN1  | 65             | 28           | 0.013*         | 2.053 (1.166-3.616) |
|                 | pN2  | 28             | 14           | 0.018*         | 2.256 (1.146-4.439) |
|                 | pN3  | 24             | 26           | 0.000**        | 4.171 (2.340-7.434) |

Abbreviations: BR: Breast Cancer; HR: hazard ratio; CI: confidence interval; Statistically significant (\* $P < 0.05$  and \*\* $P < 0.01$ ).

Additional file 1: Table S7. LINC02273 knockout neckties.

| KO cell line    | CRISPR neckties (hg38)       | KO length (bp) |
|-----------------|------------------------------|----------------|
| LM2 KO-1        | chr4:152,100,707-152,101,737 | 1030           |
| LM2 KO-2        | chr4:152,100,707-152,101,737 | 1030           |
| BT549 KO        | chr4:152,100,517-152,101,753 | 1236           |
| MDA-MB-231 KO-1 | chr4:152,100,704-152,101,603 | 899            |
| MDA-MB-231 KO-2 | chr4:152,100,707-152,101,737 | 1030           |

Additional file 1: Table S8. MS result of LINC02273 RNA pull-down

|    | Reference         | Count | Unique Peptide<br>Count | Cover (%) | MW    | PI    |
|----|-------------------|-------|-------------------------|-----------|-------|-------|
| 1  | HNRNPL            | 30    | 12                      | 17.15     | 64.1  | 8.46  |
| 2  | Human IgG H chain | 20    | 10                      | 32.62     | 50.9  | 7.89  |
| 3  | ALB               | 10    | 8                       | 11.75     | 69.2  | 5.99  |
| 4  | HRNR              | 8     | 8                       | 3.93      | 282.4 | 10.05 |
| 5  | EEF1A1            | 28    | 5                       | 22.51     | 50.1  | 9.1   |
| 6  | PKM2              | 5     | 5                       | 16.62     | 37.3  | 8.47  |
| 7  | HEL113            | 6     | 4                       | 15.45     | 53.7  | 5.06  |
| 8  | HSP70             | 5     | 4                       | 18.07     | 51.9  | 5.35  |
| 9  | Actin             | 5     | 4                       | 20.55     | 28.2  | 5.2   |
| 10 | HSP60             | 4     | 4                       | 11.88     | 60.0  | 5.59  |

Abbreviations: MS: mass spectrometry; MW: molecular weight; PI: isoelectric point;

Additional file 1: Table S9. Baseline clinicopathological characteristics of patients according to AGR2 expression

| Characteristics  |               | Low | High | P value |
|------------------|---------------|-----|------|---------|
| Age at diagnosis | <40           | 15  | 4    | 0.606   |
|                  | ≥40           | 216 | 84   |         |
| BMI at diagnosis | <18.5         | 7   | 1    | 0.746   |
|                  | 18.5-24       | 145 | 57   |         |
|                  | >24           | 77  | 29   |         |
| Subtype          | ER+/PR+       | 158 | 80   | 0.000** |
|                  | HER2 positive | 39  | 6    |         |
|                  | TNBC          | 28  | 2    |         |
| ER               | Negative      | 82  | 10   | 0.000** |
|                  | Positive      | 148 | 78   |         |
| PR               | Negative      | 68  | 11   | 0.001** |
|                  | Positive      | 151 | 74   |         |
| HER2             | Negative      | 147 | 59   | 0.576   |
|                  | Positive      | 69  | 23   |         |
| Ki-67            | Low           | 89  | 28   | 0.736   |
|                  | High          | 65  | 18   |         |
| Tumor grade      | I & II        | 137 | 53   | 0.593   |
|                  | III           | 86  | 28   |         |
| pT               | pT1           | 85  | 35   | 0.431   |
|                  | pT2           | 138 | 48   |         |
|                  | pT3           | 7   | 5    |         |
| pN               | pN0           | 94  | 39   | 0.913   |
|                  | pN1           | 68  | 25   |         |
|                  | pN2           | 32  | 10   |         |
|                  | pN3           | 37  | 13   |         |
| LVI              | Negative      | 125 | 46   | 0.704   |
|                  | Positive      | 100 | 41   |         |

Abbreviations: BR: Breast Cancer; HR: hazard ratio; CI: confidence interval; BMI, body mass index; ER, estrogen receptor; PR, progesterone receptor; HER2, human epidermal growth factor receptor 2; LVI: lymphovascular invasion. Fisher exact test was used. Statistically significant (\*P<0.05 and \*\*P<0.01).

Additional file 1: Table S10. Multivariate COX regression analyses of RFS in BC patients

|                |           | No of<br>Patients | No of<br>Events | <i>P</i> value | HR                  |
|----------------|-----------|-------------------|-----------------|----------------|---------------------|
| LINC02273/AGR2 | low/low   | 105               | 27              |                |                     |
|                | high/low  | 69                | 30              | 0.303          | 1.317 (0.779-2.227) |
|                | low/high  | 27                | 10              | 0.402          | 1.365 (0.66-2.826)  |
|                | high/high | 28                | 23              | 0.001**        | 2.528 (1.436-4.45)  |
| pN             | pN0       | 112               | 21              |                |                     |
|                | pN1       | 65                | 28              | 0.011*         | 2.053 (1.166-3.616) |
|                | pN2       | 28                | 14              | 0.015*         | 2.256 (1.146-4.439) |
|                | pN3       | 24                | 26              | 0.000**        | 4.171 (2.340-7.434) |

Abbreviations: BR: Breast Cancer; HR: hazard ratio; CI: confidence interval; Statistically significant (\* $P < 0.05$  and \*\* $P < 0.01$ ).

Additional file 1: Table S11. Probes used in this study

| FISH probes  | Sequences           |
|--------------|---------------------|
| LINC02273-1  | CACCTGAGACACTTTCCA  |
| LINC02273-2  | GTTGTGTGCCACTCAGAT  |
| LINC02273-3  | CCAGCACACACCACATTT  |
| LINC02273-4  | TACTCTCGAGCTCCTCAG  |
| LINC02273-5  | CCTTGCCACCTCTTTAAA  |
| LINC02273-6  | CTCACTTCCTCACACCAA  |
| LINC02273-7  | GGTGCCCTTGACTTTGAA  |
| LINC02273-8  | TGTGCCAAGCTTGTTCTC  |
| LINC02273-9  | ATCTGGTTTCCTGGTAGC  |
| LINC02273-10 | CGGAATGCAGTTTCCCAT  |
| LINC02273-11 | TTCCTATACTTCCTGGA   |
| LINC02273-12 | GGTCTTCCCACCTTTTATT |
| LINC02273-13 | GCAGCTGGATGACTGCAA  |
| LINC02273-14 | GTGAGCCCTCGAGAGAAA  |
| LINC02273-15 | TTCACATCCTCCCAGGAC  |
| LINC02273-16 | TGGGAGTCAGGGTACAGG  |
| LINC02273-17 | AGACTCTTGGCCTCAGTG  |
| LINC02273-18 | GAGTCCTAGAGGACAGCT  |
| LINC02273-19 | GTGGCTGAAGTGAGTGAA  |
| LINC02273-20 | GAAACACAGTCAGCGCTT  |
| LINC02273-21 | CAGGAACTGCCCTTTGGT  |
| LINC02273-22 | AGAGGGGGAGTAGAAGCC  |
| LINC02273-23 | AGTAACCCTGGCACCTTG  |
| LINC02273-24 | AGTGATGCCATGGAAGGC  |
| LINC02273-25 | AAACCATCCAGGCTCACT  |
| LINC02273-26 | GGGTTTTTTGTTGTCGGC  |
| LINC02273-27 | CCTTGGGGAAGGGGAATG  |
| LINC02273-28 | CCTTGCCCTGGGTAAGTG  |
| LINC02273-29 | ACTCAAATCTCAGGCTGG  |
| LINC02273-30 | CCTGTAGGGGACTCAGTA  |
| LINC02273-31 | TTCAGCTCATAGCTGTGC  |
| LINC02273-32 | CTGAGGTCTCAGGGGTTA  |
| LINC02273-33 | GTGTCAAATACTGTCCC   |



|              |                    |
|--------------|--------------------|
| LINC02273-34 | GGATCCCCTCAGTAAACT |
| LINC02273-35 | CTTCCCCTGCACACTAA  |
| LINC02273-36 | TTGTGGATGGCCAAGCTT |
| LINC02273-37 | GCCCAAGATCAAGGTGTC |
| LINC02273-38 | TGGCATGCTGTCCACAGA |
| LINC02273-39 | CAGGGATAACTCGTGCGA |
| LINC02273-40 | CAGCCTGCTAATTTGAGC |
| LINC02273-41 | CTGAAGCCTGTCCAGGAA |
| LINC02273-42 | TGTCTGTATCACCAGGGA |

---

| ChIRP probes       | Sequences             |
|--------------------|-----------------------|
| PROBE-LINC02273-1  | ACACTTTCCAAGCATTGCAA  |
| PROBE-LINC02273-2  | AGCACACACCACATTTTCATA |
| PROBE-LINC02273-3  | ACTTCTCACACCAATCAAG   |
| PROBE-LINC02273-4  | CCAGACACACTGGACTTATT  |
| PROBE-LINC02273-5  | ATAATAGGTCTTCCCCTTT   |
| PROBE-LINC02273-6  | TGATGGGAGTCAGGGTACAG  |
| PROBE-LINC02273-7  | GTGGCTGAAGTGAGTGAAC   |
| PROBE-LINC02273-8  | AGACAGTGATGCCATGGAAG  |
| PROBE-LINC02273-9  | ACTCAAATCTCAGGCTGGAC  |
| PROBE-LINC02273-10 | AATGAACCTGGAGAGAGGCA  |
| PROBE-LINC02273-11 | GTTGTATTGGATGAGGATCC  |
| PROBE-LINC02273-12 | ATTTGTTCTGAGTCTCTCTC  |
| PROBE-LINC02273-13 | CCGTGACAAAGGACCACAGG  |
| PROBE-LINC02273-14 | CATGCTGTCCACAGACAGTG  |
| PROBE-LINC02273-15 | GTATCACCAGGGAGAATGTT  |
| PROBE-LACZ-1       | AAAATAATTCGCGTCTGGCC  |
| PROBE-LACZ-2       | GCGTTAAAGTTGTTCTGCTT  |
| PROBE-LACZ-3       | TCGGCAAAGACCAGACCGTT  |
| PROBE-LACZ-4       | CGCATCAGCAAGTGTATCTG  |

---

Additional file 1: Table S12. Primers used in this study

| RT-qPCR primers    | Sequences               |
|--------------------|-------------------------|
| qU6-S              | CTCGCTTCGGCAGCACATAT    |
| qU6-AS             | TATGGAACGCTTCACGAATTTG  |
| qGAPDH-S           | AACGGGAAGCTTGTCATCAA    |
| qGAPDH-AS          | TGGACTCCACGACGTACTIONCA |
| qACTB-S            | GCCAACCGCGAGAAGATGA     |
| qACTB-AS           | CATCACGATGCCAGTGGTA     |
| qhnRNPL-S          | TACGCAGCCGACAACCAAATA   |
| qhnRNPL-AS         | CTCCGGGAGTCATCCGAGT     |
| qMYC-S             | AGCTGCTTAGACGCTGGATTT   |
| qMYC-AS            | CGAGGTCATAGTTCCTGTTGGT  |
| qLINC02273-1653-S  | CTCCCAGCAGCTAAGGTGAC    |
| qLINC02273-1653-AS | CACTTCCTCACACCAATCAAGTC |
| qLINC02273-1252-S  | CTCCCAGCAGCTAAGGTAGAAG  |
| qLINC02273-1252-AS | TACAGGGTTCACATCCTCCCA   |
| qFOXN4-S           | AGGGCTCCTGTAGACTTCATC   |
| qFOXN4-AS          | CCAAGCTGAATCCCTCATCCT   |
| qGABRG1-S          | GTAAACAGCATTGGACCAGTTGA |
| qGABRG1-AS         | CGAAGCAGACGATTAGGAGTTG  |
| qZNF831-S          | CAGACGCACCTCAACAACCTC   |
| qZNF831-AS         | GCTTCGGTCCCTCACATCCAG   |
| qCHRNA7-S          | GCTGGTCAAGAACTACAATCCC  |
| qCHRNA7-AS         | CTCATCCACGTCCATGATCTG   |
| qEBF1-S            | TGGGGTTCGTGGAGAAGGAA    |
| qEBF1-AS           | CACGTAGAAATCCTGCTCCG    |
| qERP27-S           | CCATACTCCATAGCATGGTGC   |
| qERP27-AS          | TGATGTTGTAGTGTGTCAGAACC |
| qGUCY2C-S          | CCTTGACACAGAATTGAGCTACC |
| qGUCY2C-AS         | CATCAGCCTGGTTAAGGTTTCTT |
| qAGR2-S            | AGAGCAGTTTGTCTCCTCAA    |
| qAGR2-AS           | CAGGTTTCGTAAGCATAGAGACG |

| ChIP-qPCR & ChIRP-qPCR | Sequences                        |
|------------------------|----------------------------------|
| qdnFOXN4-S             | TGGGCTGTTGGTGAGTGAAC             |
| qdnFOXN4-AS            | CCAGCAACCGTGAGTGGTT              |
| qdnGABRG1-S            | AGCTCAACTCTCTTCTGTTGTT           |
| qdnGABRG1-AS           | TGGGATTTCCCCTCAAGGCATTT          |
| qdnZNF831-S            | GTTAAATGACTGCTGAGCCTCCA          |
| qdnZNF831-AS           | GCTCACAGGTGTTCTCACTTGG           |
| qdCHRNA7-S             | GGTAATTGCAGGTTGCCTCTGA           |
| qdCHRNA7-AS            | AACAGCTGGGGTTTTTGATCTT           |
| qdnEBF1-S              | TGAAATGTGGTTGGGTGCTTAT           |
| qdnEBF1-AS             | CATACTGCAATCAAATCCGGCA           |
| qdnERP27-S             | CCTGAAGGCATTAGAGAGCCAG           |
| qdnERP27-AS            | AAAAGCAGTCCTCAATGCAGGG           |
| qdnGUCY2C-S            | CCAAAACCAGGGATGAGATGGT           |
| qdnGUCY2C-AS           | TGAAGGGAGAGGGCAAGTTTCA           |
| qdnAGR2-S              | AAAAACCCCTCCTTTGCTTGTCT          |
| qdnAGR2-AS             | TTGTCATAGTGGCTGACGGATG           |
| qdnH3-S                | CTGAGACGAAAATCCCTGGACC           |
| qdnH3-AS               | CTTTCTTTGGCTAGAGCTGGCA           |
| <hr/>                  |                                  |
| Race primers           | Sequences                        |
| 3'RACE                 | ACTCTGGGTGGTCCTGGGAGGATGTGAA     |
| 5'RACE                 | TTAGGGGACTCAGTAGGAACTCAAATCTCAGG |
| <hr/>                  |                                  |
| KO genotyping primers  | Sequences                        |
| LINC02273KO-S          | GAAAGCAGAGAAAAATTCATCAGACACGG    |
| LINC02273KO-AS         | AGGGTCCTTTCAGTATTTTCCACAGG       |

Additional file 1: Table S13. shRNA, siRNA, CRISPR, and ASOs

---

| shRNA target sequence |                       |
|-----------------------|-----------------------|
| shLINC02273-2         | GTGGGAAGACCTATTATAAGT |
| shLINC02273-3         | CTCTCCAAGGTGCCAGGGTTA |
| shSCR                 | CCTAAGGTAAAGTCGCCCTCG |

---

| CRISPR target sequence |                       |
|------------------------|-----------------------|
| LINC02273KO-S1-F       | GGCAACAAGTGTGAAGGGTGA |
| LINC02273KO-S2-F       | GCAGGAAGTGGGTGTACATGT |
| LINC02273KO-AS1-F      | GGGGGATACTGGCTGAAAACA |
| LINC02273KO-AS2-F      | GGTGTTAGGCCTGAGAGATGA |
| hnRNPL-1               | TCTGAAGATCGAATACGCAA  |
| hnRNPL-2               | CTGGGGACTCGGATGACTCC  |

---

| siRNAs target sequence |                     |
|------------------------|---------------------|
| sihnRNPL1              | CATCATGCCTGGTCAGTCA |
| sihnRNPL2              | AGGTTTGTAGAGGCTTACT |
| siNC                   | TTCTCCGAACGTGTCACGT |

---

| ASOs sequence |                       |
|---------------|-----------------------|
| ASO-1         | CTCTCCAGGTTTCATTCTAA  |
| ASO-2         | ACAAATCAATCTGCGGACAC  |
| ASO-3         | CACACACCCAAGAAAACAAA  |
| NC            | lnc6N0000001, Ribobio |

---
